# Supplementary material for: Development and Validation of a Novel Model to Predict Regional Lymph Node Metastasis in Patients With Hepatocellular Carcinoma
Source: PubMed Central journal article supplement (PMC8874317; doi:10.3389/fonc.2022.835957), 2022-02-11
Supplement: Image_1.pdf [file Image_1.pdf]

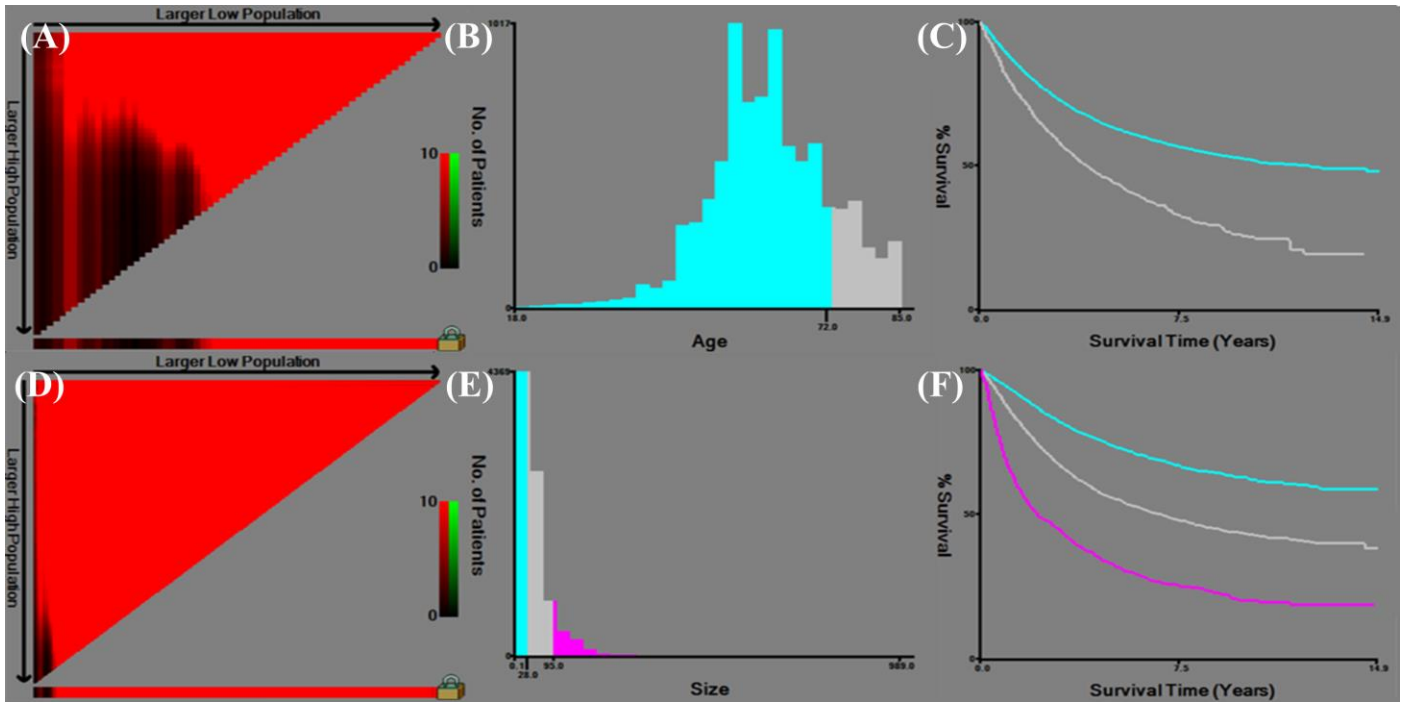

**Figure S1** X-tile plots for determining optimal cut-off values of (A)-(C) age and (D)-(F) tumor size according to cancer-specific survival.
