# Supplementary material for: Development and Validation of a Novel Model to Predict Regional Lymph Node Metastasis in Patients With Hepatocellular Carcinoma
Source: PubMed Central journal article supplement (PMC8874317; doi:10.3389/fonc.2022.835957), 2022-02-11
Supplement: Image_2.pdf [file Image_2.pdf]

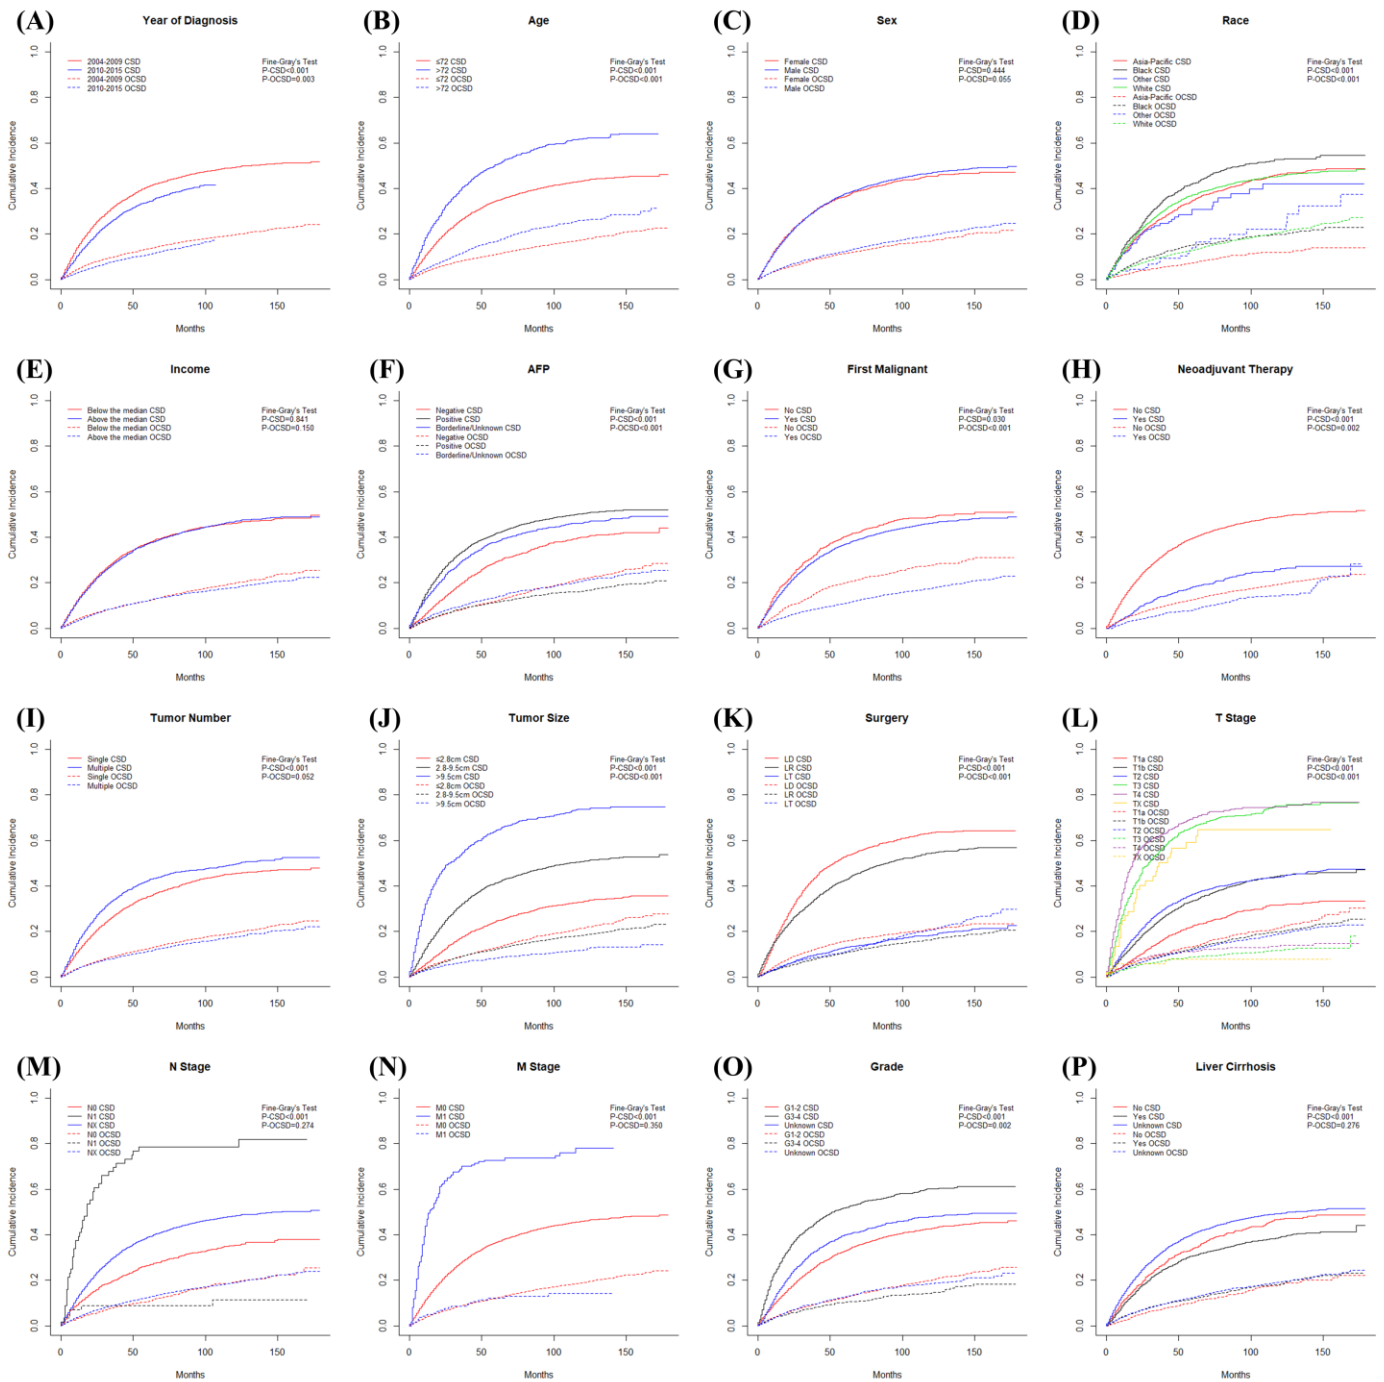

**Figure S2** Cumulative incidence functions of mortality of HCC patients according to (A) Year of Diagnosis, (B) Age, (C) Sex, (D) Race, (E) Income, (F) AFP, (G) First Malignant, (H) Neoadjuvant Therapy, (I) Tumor Number, (J) Tumor Size, (K) Surgery, (L) pT stage, (M) pN stage, (N) pM stage, (O) Tumor Grade, (P) Liver Cirrhosis.

HCC, Hepatocellular carcinoma; AFP, Alpha fetoprotein; LD, Local destruction; LR, Liver resection; LT, Liver transplantation; CSD, Cancer-specific death; OCSD, Other cause-specific death.
