# Supplementary material for: Development and Validation of a Novel Model to Predict Regional Lymph Node Metastasis in Patients With Hepatocellular Carcinoma
Source: PubMed Central journal article supplement (PMC8874317; doi:10.3389/fonc.2022.835957), 2022-02-11
Supplement: Image_3.pdf [file Image_3.pdf]

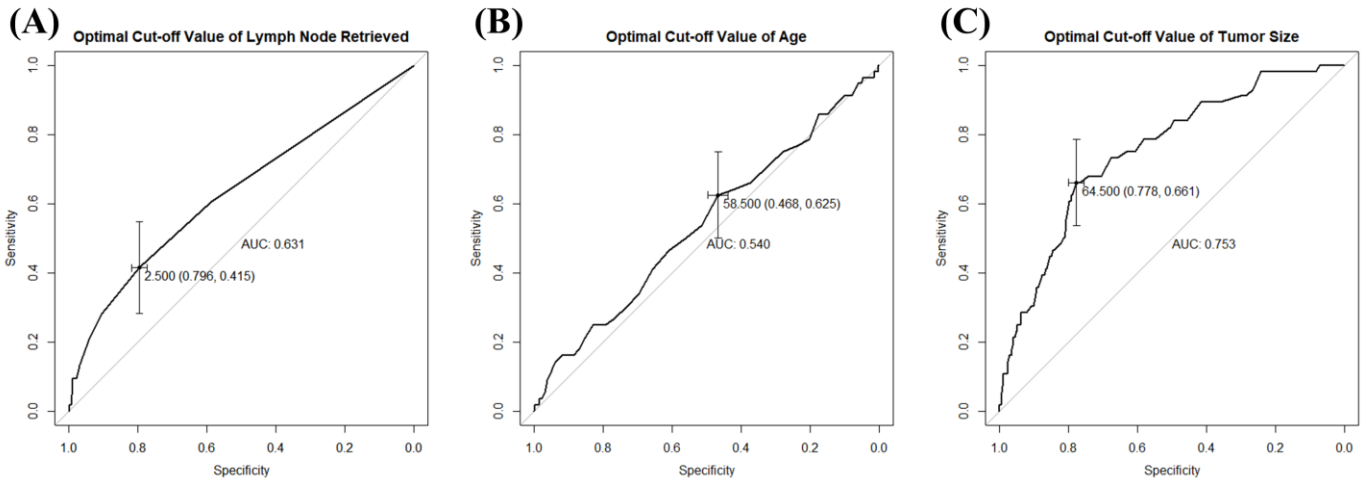

**Figure S3** Receiver operating characteristic curve analyses for determining optimal cut-off values of **(A)** number of lymph nodes retrieved, **(B)** age, **(C)** tumor size based on Youden index.
